# Supplementary material for: Changes in Inflammatory Cytokines in Responders and Non-Responders to TNFα Inhibitor and IL-17A Inhibitor: A Study Examining Psoriatic Arthritis Patients
Source: MDPI journal article supplement (doi:10.3390/ijms25053002), 2024-03-05
Supplement: s1 [file s1]

**Table S5:** Log-transformed mean changes in biomarker levels of IL-17Ai initiators stratified by PASI50

|                | Responders<br>(n=7)    |   |                  | Non-responders<br>(n=4) |   |           |
|----------------|------------------------|---|------------------|-------------------------|---|-----------|
|                | Mean change            | n | p-value          | Mean change             | n | p-value   |
| VCAM-1         | 0.091 (-1.144; 1.326)  | 6 | p = 0.313        | 0.212 (-0.388; 0.812)   | 4 | p = 0.375 |
| SAA            | -0.110 (-4.185; 3.966) | 6 | p = 0.688        | -1.954 (12.045; 8.136)  | 2 | p = 1.000 |
| ICAM-1         | 0.131 (-0.858; 1.120)  | 6 | p = 0.219        | 0.095 (-0.408; 0.598)   | 4 | p = 0.125 |
| CRP            | 0.050 (-3.193; 3.294)  | 6 | p = 0.688        | -0.021 (-3.930; 3.889)  | 4 | p = 1.000 |
| MIP-3 $\alpha$ | -0.018 (-1.555; 1.519) | 7 | p = 0.813        | 0.460 (-1.300; 2.220)   | 4 | p = 0.250 |
| IL-27          | -0.621 (-4.075; 0.156) | 7 | p = 0.156        | -0.043 (-0.869; 0.783)  | 4 | p = 0.875 |
| IL-23          | 0.000 (-3.141; 4.141)  | 6 | p = 1.000        | 0.092 (-4.747; 4.931)   | 2 | p = 0.500 |
| IL-22          | 0.517 (-2.091; 3.124)  | 6 | p = 0.438        | -0.722 (-5.230; 3.786)  | 4 | p = 0.125 |
| TNF $\alpha$   | 0.129 (-5.536; 5.793)  | 7 | p = 0.219        | 0.237 (-0.527; 1.000)   | 4 | p = 0.125 |
| IL-8           | -0.352 (-2.515; 1.811) | 7 | p = 0.156        | 0.356 (-0.991; 1.703)   | 4 | p = 0.125 |
| IL-6           | -0.055 (-3.305; 3.196) | 7 | p = 0.813        | 0.055 (-0.938; 1.049)   | 4 | p = 0.875 |
| IL-10          | -0.158 (-2.158; 2.499) | 7 | p = 0.375        | 0.059 (-1.190; 1.307)   | 4 | p = 0.875 |
| IFN $\gamma$   | -0.088 (-3.160; 2.983) | 7 | p = 0.813        | -0.017 (-2.363; 2.330)  | 3 | p = 1.000 |
| IL-1RA         | -0.210 (-2.484; 2.064) | 7 | p = 0.938        | 0.049 (-1.967; 2.066)   | 4 | p = 0.875 |
| IL-17D         | -0.065 (-1.138; 1.008) | 6 | p = 0.563        | 0.329 (-0.726; 1.383)   | 4 | p = 0.625 |
| IL-17C         | 0.307 (-0.952; 1.566)  | 5 | p = 0.125        | 0.494 (-0.768; 1.755)   | 4 | p = 0.250 |
| IL-17B         | -0.812 (-2.642; 1.018) | 5 | p = 0.125        | 0.036 (-1.635; 1.707)   | 4 | p = 0.875 |
| IL-7           | -0.528 (-3.183; 2.128) | 7 | p = 0.219        | 0.113 (-2.245; 2.470)   | 4 | p = 0.625 |
| IL-5           | 0.586 (-3.150; 4.322)  | 3 | p = 0.750        | 1.518 (-1.275; 4.312)   | 2 | p = 0.500 |
| IL-1 $\alpha$  | -0.096 (-2.563; 2.372) | 6 | <b>p = 0.031</b> | 0.262 (-1.047; 1.571)   | 4 | p = 0.625 |
| IL-17A         | 3.452 (0.095; 6.810)   | 6 | <b>p = 0.016</b> | 1.742 (-2.930; 6.413)   | 4 | p = 0.375 |
| IL-16          | 0.011 (-0.726; 0.748)  | 6 | p = 0.688        | 0.254 (-0.835; 1.344)   | 4 | p = 0.125 |
| IL-15          | -0.055 (-1.265; 1.156) | 7 | p = 0.688        | -0.049 (-0.495; 0.396)  | 4 | p = 0.250 |
| IL-12/IL23p40  | 0.170 (-1.876; 2.216)  | 7 | p = 0.219        | 0.600 (-2.508; 3.708)   | 4 | p = 1.000 |
| TARC           | -0.560 (-3.005; 1.885) | 7 | p = 0.578        | 0.360 (-3.368; 4.088)   | 4 | p = 0.125 |
| MIP-1 $\beta$  | -0.285 (-2.582; 2.013) | 7 | <b>p = 0.031</b> | 0.250 (-0.489; 0.990)   | 4 | p = 0.250 |
| MIP-1 $\alpha$ | -0.173 (-1.068; 0.722) | 4 | p = 0.250        | 0.128 (-1.862; 2.118)   | 2 | p = 0.500 |
| MDC            | -0.014 (-1.474; 1.447) | 7 | p = 0.688        | 0.216 (-2.872; 3.303)   | 4 | p = 1.000 |
| MCP-4          | -0.357 (-1.633; 0.919) | 7 | p = 0.078        | 0.090 (-2.184; 2.364)   | 4 | p = 0.875 |
| MCP-1          | -0.254 (-2.327; 1.820) | 7 | <b>p = 0.047</b> | 0.280 (-1.737; 2.298)   | 4 | p = 0.250 |
| IP-10          | 0.073 (-1.367; 1.514)  | 7 | p = 0.938        | 0.506 (-0.998; 2.010)   | 4 | p = 0.375 |
| Eotaxin-3      | -0.289 (-1.817; 1.239) | 4 | p = 0.125        | -0.391 (-3.794; 3.012)  | 3 | p = 0.500 |
| Eotaxin        | -0.243 (-1.749; 1.262) | 7 | <b>p = 0.016</b> | 0.259 (-0.985; 1.503)   | 4 | p = 0.625 |
| bFGF           | 0.009 (-2.949; 2.967)  | 7 | p = 0.938        | 0.034 (-2.430; 2.499)   | 4 | p = 1.000 |
| VEGF-D         | -0.020 (-1.247; 1.207) | 7 | p = 0.578        | 0.064 (-1.756; 1.884)   | 4 | p = 0.625 |
| VEGF-C         | -0.635 (-2.649; 1.380) | 6 | p = 0.156        | 0.198 (-1.644; 2.041)   | 4 | p = 0.375 |
| VEGF-A         | -0.618 (-2.499; 1.264) | 7 | <b>p = 0.047</b> | 0.452 (-1.884; 2.788)   | 4 | p = 0.250 |
| Tie-2          | 0.0511 (-1.208; 1.311) | 7 | p = 0.688        | 0.042 (-0.637; 0.721)   | 4 | p = 0.625 |
| PlGF           | 0.112 (-1.010; 1.234)  | 7 | <b>p = 0.047</b> | 0.248 (-0.826; 1.322)   | 4 | p = 0.625 |
| Flt-1          | -0.174 (-1.041; 0.692) | 7 | p = 0.109        | 0.692 (-1.041; 0.692)   | 4 | p = 1.000 |

Mean changes with corresponding 95% confidence intervals stratified by PASI50 treatment response. IL-17Ai, Interleukin 17 inhibitor; PASI, Psoriasis Area Severity Index; VEGF, Vascular Endothelial Growth Factor; VCAM, Vascular Cell Adhesion Molecule; TNF, Tumour Necrosis Factor; Tie-2, endothelial receptor tyrosine kinase; TARC, Thymus and activation regulated chemokine; CCL, CC chemokine ligand; SAA, serum amyloid A; PlGF, Placental Growth Factor; MIP, macrophage inflammatory protein; MDC, macrophage-derived chemokine; MCP, monocyte chemoattractant protein; IP-10, IFN-induced protein-10; CXCL, CX chemokine ligand; IL, interleukin; IL-1RA, interleukin 1 receptor antagonist; IFN, interferon; ICAM, Intercellular Adhesion Molecule; Flt-1, Fms related Receptor Tyrosine Kinase-1; CRP, C-reactive protein; bFGF, basic Fibroblast Growth Factor.
