# Supplementary material for: Changes in Inflammatory Cytokines in Responders and Non-Responders to TNFα Inhibitor and IL-17A Inhibitor: A Study Examining Psoriatic Arthritis Patients
Source: MDPI journal article supplement (doi:10.3390/ijms25053002), 2024-03-05
Supplement: s1 [file s1]

**Table S4:** Log-transformed mean changes in biomarker levels of TNFi initiators stratified by PASI50

|                | Responders<br>(n=12)   |    |                     | Non-responders<br>(n=6) |   |           |
|----------------|------------------------|----|---------------------|-------------------------|---|-----------|
|                | Mean change            | n  | p-value             | Mean change             | n | p-value   |
| VCAM-1         | -0.012 (-0.977; 0.953) | 11 | p = 0.967           | 0.013 (-1.096; 1.122)   | 6 | p = 0.563 |
| SAA            | -1.183 (-4.401; 2.035) | 10 | <b>p = 0.004</b>    | -0.161 (-4.037; 3.715)  | 5 | p = 0.625 |
| ICAM-1         | -0.121 (-0.947; 0.704) | 10 | p = 0.160           | -0.023 (-1.252; 1.206)  | 5 | p = 0.813 |
| CRP            | -1.058 (-4.722; 2.605) | 10 | <b>p = 0.037</b>    | -0.310 (-5.003; 4.384)  | 6 | p = 0.313 |
| MIP-3 $\alpha$ | -0.313 (-2.683; 2.057) | 11 | p = 0.154           | 0.283 (-0.925; 1.491)   | 5 | p = 0.625 |
| IL-27          | -0.187 (-2.126; 1.752) | 12 | <b>p = 0.016</b>    | 0.056 (-0.990; 1.101)   | 5 | p = 0.813 |
| IL-23          | 0.158 (-2.935; 3.251)  | 9  | p = 0.359           | -0.035 (-2.625; 2.555)  | 3 | p = 0.750 |
| IL-22          | -0.622 (-3.523; 2.279) | 11 | <b>p = 0.042</b>    | 0.621 (-2.044; 3.287)   | 5 | p = 0.125 |
| TNF $\alpha$   | -0.326 (-2.629; 1.977) | 12 | p = 0.301           | -0.112 (-3.041; 2.816)  | 6 | p = 0.844 |
| IL-8           | -0.306 (-2.166; 1.555) | 12 | p = 0.092           | 0.028 (-0.837; 0.892)   | 6 | p = 1.000 |
| IL-6           | -0.961 (-4.182; 2.259) | 12 | <b>p = 0.012</b>    | -0.417 (-2.733; 1.899)  | 6 | p = 0.156 |
| IL-13          | 0.182 (-1.550; 1.914)  | 7  | p = 1.000           | 0.231 (-5.166; 5.627)   | 3 | p = 0.250 |
| IL-12p70       | 0.272 (-2.219; 2.764)  | 9  | p = 0.129           | -0.236 (-2.135; 1.662)  | 3 | p = 1.000 |
| IL-10          | 0.355 (-2.238; 2.947)  | 11 | <b>p = 0.010</b>    | 0.303 (-1.258; 1.864)   | 6 | p = 0.094 |
| IFN $\gamma$   | -0.086 (-2.879; 2.798) | 11 | p = 1.000           | 0.479 (-2.021; 2.980)   | 6 | p = 0.438 |
| IL-1RA         | -0.064 (-1.643; 1.514) | 12 | p = 0.569           | 0.050 (-2.956; 3.056)   | 6 | p = 1.000 |
| IL-17D         | 0.204 (-1.210; 1.619)  | 10 | p = 0.106           | 0.004 (-0.789; 0.798)   | 6 | p = 1.000 |
| IL-17C         | -0.187 (-2.553; 2.178) | 9  | p = 0.496           | -0.141 (-1.388; 1.107)  | 6 | p = 0.563 |
| IL-17B         | 0.183 (-2.769; 3.135)  | 8  | p = 0.055           | 0.059 (-2.055; 2.172)   | 5 | p = 1.000 |
| TNF $\beta$    | 0.070 (-1.625; 1.766)  | 6  | p = 1.000           | 0.161 (-0.300; 0.623)   | 3 | p = 0.250 |
| IL-7           | -0.475 (-2.594; 1.644) | 12 | p = 0.052           | -0.182 (-1.642; 1.279)  | 5 | p = 0.813 |
| IL-5           | 0.698 (-2.101; 3.498)  | 6  | p = 0.094           | 0.123 (-0.744; 0.990)   | 3 | p = 0.500 |
| IL-1 $\alpha$  | 0.274 (-1.643; 2.191)  | 11 | <b>p = 0.032</b>    | -0.015 (-2.677; 2.648)  | 3 | p = 1.000 |
| IL-17A         | 0.369 (-3.076; 3.813)  | 8  | p = 0.641           | 0.772 (-2.789; 4.333)   | 3 | p = 0.438 |
| IL-16          | 0.007 (-0.757; 0.772)  | 12 | p = 0.733           | -0.037 (-1.032; 0.958)  | 5 | p = 0.438 |
| IL-15          | 0.013 (-0.841; 0.868)  | 12 | p = 0.791           | -0.035 (-0.597; -0.528) | 5 | p = 0.438 |
| IL-12/IL23p40  | 0.280 (-1.193; 1.753)  | 12 | p = 0.129           | -0.041 (-3.359; 3.277)  | 6 | p = 0.563 |
| TARC           | -0.923 (-3.465; 1.618) | 12 | <b>p = 0.012</b>    | -0.192 (-3.938; 3.554)  | 6 | p = 0.438 |
| MIP-1 $\beta$  | -0.386 (-2.373; 1.600) | 12 | <b>p &lt; 0.001</b> | -0.029 (-1.496; 1.439)  | 6 | p = 0.844 |
| MIP-1 $\alpha$ | -0.088 (-1.440; 1.264) | 8  | p = 0.313           | 0.593 (-2.119; 3.306)   | 4 | p = 0.625 |
| MDC            | 0.062 (-1.165; 1.288)  | 12 | p = 0.733           | 0.132 (-2.302; 2.565)   | 6 | p = 0.438 |
| MCP-4          | -0.213 (-1.355; 0.929) | 12 | p = 0.092           | 0.096 (-1.653; 1.844)   | 6 | p = 0.844 |
| MCP-1          | -0.147 (-1.604; 1.310) | 12 | p = 0.204           | 0.073 (-1.395; 1.541)   | 6 | p = 0.844 |
| IP-10          | -0.153 (-1.784; 1.478) | 12 | p = 0.622           | -0.035 (-1.860; 1.790)  | 6 | p = 0.844 |
| Eotaxin-3      | -0.004 (-1.895; 1.886) | 8  | p = 0.945           | 0.238 (-1.149; 1.625)   | 6 | p = 0.219 |
| Eotaxin        | -0.152 (-1.568; 1.265) | 12 | <b>p = 0.042</b>    | 0.169 (-1.068; 1.406)   | 6 | p = 0.156 |
| bFGF           | 0.026 (-2.603; 2.655)  | 12 | p = 0.569           | -0.257 (-3.180; 2.667)  | 6 | p = 0.313 |
| VEGF-D         | -0.089 (-0.995; 0.816) | 12 | <b>p = 0.021</b>    | -0.091 (-1.250; 1.068)  | 6 | p = 0.313 |
| VEGF-C         | -0.123 (-2.128; 1.881) | 11 | p = 0.831           | -0.103 (-1.136; 0.930)  | 5 | p = 0.625 |
| VEGF-A         | -0.365 (-2.747; 2.017) | 12 | <b>p = 0.042</b>    | 0.084 (-2.033; 2.202)   | 6 | p = 1.000 |
| Tie-2          | 0.009 (-1.349; 1.367)  | 12 | p = 0.266           | 0.004 (-0.725; 0.733)   | 5 | p = 1.000 |
| PlGF           | -0.018 (-0.821; 0.796) | 12 | p = 0.677           | -0.029 (-0.660; 0.607)  | 6 | p = 0.688 |
| Flt-1          | -0.063 (-1.128; 1.002) | 12 | p = 0.380           | 0.002 (-0.892; 0.895)   | 6 | p = 1.000 |

Mean changes with corresponding 95% confidence intervals stratified by PASI50 treatment response. TNFi, Tumour Necrosis Factor alpha inhibitor; PASI, Psoriasis Area Severity Index; VEGF, Vascular Endothelial Growth Factor; VCAM, Vascular Cell Adhesion Molecule; TNF, Tumour Necrosis Factor; Tie-2, endothelial receptor tyrosine kinase; TARC, Thymus and activation regulated chemokine; CCL, CC chemokine ligand; SAA, serum amyloid A; PlGF, Placental Growth Factor; MIP, macrophage inflammatory protein; MDC, macrophage-derived chemokine; MCP, monocyte chemoattractant protein; IP-10, IFN-induced protein-10; CXCL, CX chemokine ligand; IL, interleukin; IL-1RA, interleukin 1 receptor antagonist; IFN, interferon; ICAM, Intercellular Adhesion Molecule; Flt-1, Fms related Receptor Tyrosine Kinase-1; CRP, C-reactive protein; bFGF, basic Fibroblast Growth Factor.
