# Supplementary material for: Changes in Inflammatory Cytokines in Responders and Non-Responders to TNFα Inhibitor and IL-17A Inhibitor: A Study Examining Psoriatic Arthritis Patients
Source: MDPI journal article supplement (doi:10.3390/ijms25053002), 2024-03-05
Supplement: s1 [file s1]

**Table S3:** Log-transformed mean changes in biomarker levels of IL-17Ai initiators stratified by DAPSA50

|                | Responders<br>(n=7)    |   |                  | Non-responders<br>(n=12) |    |                  |
|----------------|------------------------|---|------------------|--------------------------|----|------------------|
|                | Mean change            | n | p-value          | Mean change              | n  | p-value          |
| VCAM-1         | 0.109 (-0.651; 0.860)  | 6 | p = 0.313        | 0.113 (-0.786; 1.012)    | 12 | p = 0.233        |
| SAA            | -1.846 (-6.197; 2.506) | 6 | p = 0.156        | -0.547 (-5.339; 4.244)   | 8  | p = 0.547        |
| ICAM-1         | 0.080 (-0.790; 0.950)  | 6 | p = 0.438        | 0.079 (-0.647; 0.805)    | 12 | p = 0.064        |
| CRP            | -1.592 (-5.488; 2.303) | 6 | p = 0.156        | 0.166 (-2.813; 3.145)    | 11 | p = 0.700        |
| MIP-3 $\alpha$ | -0.202 (-3.202; 2.797) | 7 | p = 0.297        | 0.320 (-1.019; 1.659)    | 12 | <b>p = 0.016</b> |
| IL-27          | -0.694 (-4.328; 2.941) | 7 | <b>p = 0.031</b> | -0.251 (-2.770; 2.268)   | 11 | p = 1.000        |
| IL-23          | -0.114 (-1.763; 1.534) | 5 | p = 1.000        | 0.063 (-2.937; 3.064)    | 9  | p = 0.203        |
| IL-22          | 0.565 (-3.290; 4.421)  | 6 | p = 0.313        | 0.006 (-3.022; 3.033)    | 11 | p = 0.577        |
| TNF $\alpha$   | 0.232 (-5.316; 5.781)  | 7 | p = 0.375        | 0.011 (-1.460; 1.482)    | 12 | p = 0.176        |
| IL-8           | -0.525 (-2.289; 1.140) | 7 | p = 0.109        | 0.219 (-1.757; 2.195)    | 12 | <b>p = 0.007</b> |
| IL-6           | -0.888 (-4.241; 2.464) | 7 | p = 0.109        | 0.042 (-1.906; 1.989)    | 12 | p = 0.970        |
| IL-10          | -0.021 (-2.692; 2.649) | 7 | p = 0.375        | 0.131 (-1.313; 1.575)    | 12 | p = 0.110        |
| IFN $\gamma$   | 0.258 (-2.269; 2.785)  | 7 | p = 0.469        | -0.107 (-3.447; 3.232)   | 11 | p = 0.966        |
| IL-1RA         | -0.381 (-2.906; 2.143) | 7 | p = 0.578        | 0.047 (-2.272; 2.365)    | 12 | p = 0.733        |
| IL-17D         | 0.070 (-1.287; 1.428)  | 4 | p = 1.000        | 0.130 (-1.327; 1.586)    | 12 | p = 0.380        |
| IL-17C         | 0.081 (-1.845; 2.008)  | 5 | p = 0.813        | 0.394 (-1.086; 1.874)    | 10 | <b>p = 0.010</b> |
| IL-17B         | -0.549 (-2.921; 1.824) | 5 | p = 0.313        | -0.063 (-1.377; 1.251)   | 11 | p = 0.765        |
| IL-7           | -0.861 (-3.053; 1.330) | 7 | p = 0.109        | 0.244 (-1.714; 2.202)    | 12 | <b>p = 0.009</b> |
| IL-5           | 0.519 (-2.317; 3.356)  | 4 | p = 0.625        | 0.424 (-2.127; 2.976)    | 8  | p = 0.250        |
| IL-1 $\alpha$  | -0.133 (-2.590; 2.324) | 6 | <b>p = 0.031</b> | 0.112 (-1.869; 2.094)    | 11 | p = 0.577        |
| IL-17A         | 2.490 (-1.864; 6.845)  | 7 | <b>p = 0.031</b> | 2.476 (-1.459; 6.410)    | 10 | <b>p = 0.001</b> |
| IL-16          | -0.076 (-1.061; 0.909) | 6 | p = 0.313        | 0.120 (-1.292; 1.533)    | 12 | p = 0.064        |
| IL-15          | -0.023 (-0.878; 0.832) | 7 | p = 0.832        | -0.077 (-0.951; 0.796)   | 12 | p = 0.042        |
| IL-12/IL23p40  | 0.015 (-2.388; 2.417)  | 7 | p = 1.000        | 0.112 (-2.335; 2.560)    | 12 | p = 0.850        |
| TARC           | -0.807 (-3.027; 1.413) | 7 | p = 0.156        | 0.392 (-2.029; 2.813)    | 12 | p < 0.001        |
| MIP-1 $\beta$  | -0.253 (-1.527; 1.021) | 7 | p = 0.078        | 0.065 (-1.194; 1.324)    | 12 | p = 0.424        |
| MIP-1 $\alpha$ | -0.077 (-1.004; 0.851) | 6 | p = 0.313        | -0.066 (-1.869; 1.738)   | 5  | p = 0.813        |
| MDC            | -0.078 (-1.317; 1.161) | 7 | p = 0.230        | 0.051 (-1.764; 1.866)    | 12 | p = 0.519        |
| MCP-4          | -0.348 (-1.819; 1.123) | 7 | p = 0.219        | 0.099 (-1.287; 1.486)    | 12 | p = 0.129        |
| MCP-1          | -0.151 (-2.453; 2.150) | 7 | p = 0.375        | 0.096 (-1.628; 1.820)    | 12 | p = 0.339        |
| IP-10          | 0.024 (-1.408; 1.457)  | 7 | p = 0.938        | 0.181 (-1.866; 2.227)    | 12 | p = 0.339        |
| Eotaxin-3      | 0.080 (-1.906; 2.065)  | 4 | p = 0.875        | -0.113 (-2.191; 1.964)   | 7  | p = 0.938        |
| Eotaxin        | -0.160 (-1.535; 1.216) | 7 | p = 0.219        | 0.074 (-1.231; 1.379)    | 12 | p = 0.733        |
| bFGF           | -0.726 (-5.307; 3.855) | 7 | p = 0.109        | 0.295 (-2.454; 3.044)    | 12 | p = 0.052        |
| VEGF-D         | -0.055 (-1.168; 1.058) | 7 | p = 0.469        | 0.66 (-1.203; 1.336)     | 12 | <b>p = 0.027</b> |
| VEGF-C         | -0.641 (-2.463; 1.181) | 6 | p = 0.313        | 0.192 (-1.277; 1.661)    | 9  | <b>p = 0.039</b> |
| VEGF-A         | -0.763 (-2.949; 1.421) | 7 | p = 0.156        | 0.160 (-1.766; 2.086)    | 12 | p = 0.151        |
| Tie-2          | -0.000 (-1.156; 1.155) | 7 | p = 1.000        | 0.029 (-1.821; 1.879)    | 12 | p = 0.204        |
| PlGF           | -0.108 (-0.934; 0.718) | 7 | p = 0.375        | 0.122 (-1.190; 1.435)    | 12 | p = 0.301        |
| Flt-1          | -0.120 (-1.074; 0.834) | 8 | p = 0.156        | -0.091 (-0.998; 0.817)   | 12 | p = 0.339        |

Mean changes with corresponding 95% confidence intervals stratified by DAPSA50 treatment response. IL-17i, Interleukin-17 inhibitor; DAPSA, Disease Activity in Psoriatic Arthritis; VEGF, Vascular Endothelial Growth Factor; VCAM, Vascular Cell Adhesion Molecule; TNF, Tumour Necrosis Factor; Tie-2, endothelial receptor tyrosine kinase; TARC, Thymus and activation regulated chemokine, SAA, serum amyloid A; PlGF, Placental Growth Factor; MIP, macrophage inflammatory protein; MDC, macrophage-derived chemokine; MCP, monocyte chemoattractant protein; IP-10, IFN-induced protein-10; IL, interleukin; IL-1RA, interleukin 1 receptor antagonist; IFN, interferon; ICAM, Intercellular Adhesion Molecule; Flt-1, Fms related Receptor Tyrosine Kinase-1; CRP, C-reactive protein; bFGF, basic Fibroblast Growth Factor.
