# Supplementary material for: Changes in Inflammatory Cytokines in Responders and Non-Responders to TNFα Inhibitor and IL-17A Inhibitor: A Study Examining Psoriatic Arthritis Patients
Source: MDPI journal article supplement (doi:10.3390/ijms25053002), 2024-03-05
Supplement: s1 [file s1]

**Table S2:** Log-transformed mean changes in biomarker levels of TNFi initiators stratified by DAPSA50

|                | Responders<br>(n=11)   |    |                  | Non-responders<br>(n=9) |   |                  |
|----------------|------------------------|----|------------------|-------------------------|---|------------------|
|                | Mean change            | n  | p-value          | Mean change             | n | p-value          |
| VCAM-1         | -0.013 (-1.103; 1.075) | 11 | p = 1.000        | 0.029 (-1.009; 1.068)   | 8 | p = 0.461        |
| SAA            | -0.88 (-4.336; 2.568)  | 10 | p = 0.160        | -0.333 (-3.148; 2.483)  | 7 | <b>p = 0.031</b> |
| ICAM-1         | -0.072 (-0.946; 0.802) | 10 | p = 0.557        | -0.029 (-1.250; 1.192)  | 7 | p = 1.000        |
| CRP            | -1.030 (-4.502; 2.441) | 10 | <b>p = 0.049</b> | -0.013 (-3.888; 3.861)  | 8 | p = 0.844        |
| MIP-3 $\alpha$ | -0.323 (-2.191; 1.545) | 11 | p = 0.240        | 0.191 (-2.075; 2.458)   | 7 | p = 0.834        |
| IL-27          | -0.123 (-1.234; 0.987) | 11 | p = 0.054        | -0.094 (-2.455; 2.267)  | 8 | p = 0.383        |
| IL-23          | 0.084 (-2.149; 2.316)  | 8  | p = 0.195        | 0.173 (-3.137; 3.482)   | 6 | p = 0.688        |
| IL-22          | -0.094 (-2.499; 2.311) | 11 | p = 0.520        | -0.390 (-3.526; 2.745)  | 7 | p = 0.578        |
| TNF $\alpha$   | 0.251 (-2.163; 2.665)  | 11 | p = 0.831        | -0.372 (-3.904; 3.160)  | 9 | p = 0.820        |
| IL-8           | -0.202 (-1.516; 1.112) | 11 | p = 0.148        | -0.192 (-2.256; 1.873)  | 9 | p = 0.652        |
| IL-6           | -0.965 (-4.303; 2.373) | 11 | <b>p = 0.032</b> | -0.308 (-2.380; 1.765)  | 9 | p = 0.098        |
| IL-12p70       | 0.587 (-2.296; 3.470)  | 10 | <b>p = 0.049</b> | -0.185 (-2.270; 1.901)  | 4 | p = 0.875        |
| IL-10          | 0.381 (-1.740; 2.501)  | 11 | <b>p = 0.010</b> | 0.376 (-1.720; 2.472)   | 8 | p = 0.055        |
| IFN $\gamma$   | -0.038 (-2.569; 2.493) | 11 | p = 0.966        | 0.518 (-2.209; 3.244)   | 8 | p = 0.148        |
| IL-1RA         | 0.078 (-2.974; 3.130)  | 11 | p = 0.465        | -0.035 (-1.889; 1.819)  | 9 | p = 0.359        |
| IL-17D         | 0.235 (-1.383; 1.853)  | 9  | p = 0.055        | -0.005 (-1.024; 1.013)  | 8 | p = 0.945        |
| IL-17C         | -0.225 (-2.143; 1.693) | 8  | p = 0.547        | -0.263 (-2.741; 2.215)  | 9 | p = 0.250        |
| IL-17B         | 0.080 (-2.168; 2.330)  | 8  | p = 0.547        | 0.190 (-2.697; 3.077)   | 7 | p = 0.219        |
| IL-7           | -0.281 (-2.090; 1.529) | 11 | p = 0.320        | -0.419 (-2.831; 1.992)  | 8 | p = 0.313        |
| IL-5           | 0.244 (-2.083; 2.571)  | 6  | p = 0.219        | 0.780 (-1.763; 3.323)   | 5 | p = 0.125        |
| IL-1 $\alpha$  | 0.160 (-1.879; 2.200)  | 9  | p = 0.129        | 0.272 (-2.228; 2.773)   | 7 | p = 0.219        |
| IL-17A         | 0.325 (-3.131; 3.780)  | 8  | p = 0.461        | 0.640 (-2.284; 3.564)   | 6 | p = 0.297        |
| IL-16          | 0.031 (-0.785; 0.848)  | 11 | p = 0.638        | 0.025 (-0.872; 0.921)   | 8 | p = 0.742        |
| IL-15          | 0.008 (-0.695; 0.710)  | 11 | p = 0.966        | 0.003 (-1.009; 1.015)   | 8 | p = 0.945        |
| IL-12/IL23p40  | 0.157 (-1.940; 2.253)  | 11 | p = 0.067        | 0.223 (-1.780; 2.246)   | 9 | p = 0.496        |
| TARC           | -0.629 (-3.446; 2.188) | 11 | <b>p = 0.042</b> | -0.641 (-3.963; 2.680)  | 9 | p = 0.098        |
| MIP-1 $\beta$  | -0.240 (-2.618; 2.138) | 11 | p = 0.054        | -0.230 (-2.103; 1.643)  | 9 | <b>p = 0.027</b> |
| MIP-1 $\alpha$ | -0.084 (-1.636; 1.467) | 8  | p = 0.313        | 0.411 (-1.920; 2.743)   | 6 | p = 0.438        |
| MDC            | 0.076 (-1.718; 1.871)  | 11 | p = 0.413        | 0.082 (-1.919; 2.083)   | 9 | p = 0.910        |
| MCP-4          | -0.031 (-1.740; 1.678) | 11 | p = 0.278        | -0.132 (-1.363; 1.099)  | 9 | p = 0.570        |
| MCP-1          | -0.124 (-1.671; 1.423) | 11 | p = 0.067        | -0.003 (-1.579; 1.573)  | 9 | p = 0.570        |
| IP-10          | -0.120 (-2.165; 1.765) | 11 | p = 0.148        | 0.124 (-1.650; 1.897)   | 9 | p = 0.098        |
| Eotaxin-3      | 0.108 (-1.875; 2.091)  | 8  | p = 0.313        | 0.195 (-1.435; 1.825)   | 8 | p = 0.383        |
| Eotaxin        | -0.045 (-1.575; 1.485) | 11 | p = 0.638        | -0.027 (-1.191; 1.138)  | 9 | p = 0.910        |
| bFGF           | -0.028 (-2.891; 2.836) | 11 | p = 0.520        | -0.070 (-2.520; 2.381)  | 9 | p = 0.820        |
| VEGF-D         | -0.074 (-0.983; 0.834) | 11 | <b>p = 0.042</b> | -0.105 (-1.139; 0.930)  | 9 | p = 0.055        |
| VEGF-C         | -0.014 (-1.305; 1.276) | 11 | p = 0.898        | -0.230 (-2.580; 2.121)  | 7 | p = 0.578        |
| VEGF-A         | -0.095 (-1.911; 1.721) | 11 | p = 0.320        | -0.239 (-2.971; 2.492)  | 9 | p = 0.359        |
| Tie-2          | 0.048 (-1.168; 1.264)  | 11 | p = 0.365        | -0.072 (-1.399; 1.254)  | 8 | p = 1.000        |
| PIGF           | 0.007 (-0.734; 0.747)  | 11 | p = 0.831        | -0.016 (-0.838; 0.807)  | 9 | p = 0.820        |
| Flt-1          | 0.011 (-0.948; 0.971)  | 11 | p = 0.898        | -0.095 (-1.124; 0.933)  | 9 | p = 0.250        |

Mean changes with corresponding 95% confidence intervals stratified by DAPSA50 treatment response. TNFi, Tumour Necrosis Factor alpha inhibitor; DAPSA, Disease Activity in Psoriatic Arthritis; VEGF, Vascular Endothelial Growth Factor; VCAM, Vascular Cell Adhesion Molecule; TNF, Tumour Necrosis Factor; Tie-2, endothelial receptor tyrosine kinase; TARC, Thymus and activation regulated chemokine; SAA, serum amyloid A; PIGF, Placental Growth Factor; MIP, macrophage inflammatory protein; MDC, macrophage-derived chemokine; MCP, monocyte chemoattractant protein; IP-10, IFN-induced protein-10; IL, interleukin; IL-1RA, interleukin 1 receptor antagonist; IFN, interferon; ICAM, Intercellular Adhesion Molecule; Flt-1, Fms related Receptor Tyrosine Kinase-1; CRP, C-reactive protein; bFGF, basic Fibroblast Growth Factor.
