# Supplementary material for: Changes in Inflammatory Cytokines in Responders and Non-Responders to TNFα Inhibitor and IL-17A Inhibitor: A Study Examining Psoriatic Arthritis Patients
Source: MDPI journal article supplement (doi:10.3390/ijms25053002), 2024-03-05
Supplement: s1 [file s1]

**Table S1:** Biomarker levels at baseline in PsA patients initiating either TNFi, IL-17Ai or MTX

|                | All<br>(n = 67)                                                             | n  | TNFi<br>(n = 28)                                                            | n  | IL-17Ai (n =19)                                                              | n  | MTX (n =20)                                                                  | n  | p-value          |
|----------------|-----------------------------------------------------------------------------|----|-----------------------------------------------------------------------------|----|------------------------------------------------------------------------------|----|------------------------------------------------------------------------------|----|------------------|
| VCAM-1         | 8.350x10 <sup>6</sup> (6.374x10 <sup>6</sup> -9.931x10 <sup>6</sup> )       | 64 | 7.325x10 <sup>6</sup> (6.601x10 <sup>6</sup> -9.934x10 <sup>6</sup> )       | 27 | 8.613x10 <sup>6</sup> (6.909x10 <sup>6</sup> -10.195x10 <sup>6</sup> )       | 18 | 9.152 x10 <sup>6</sup> (7.588 x10 <sup>6</sup> -9.839 x10 <sup>6</sup> )     | 19 | p = 0.486        |
| SAA            | 5.968x10 <sup>7</sup> (2.951x10 <sup>7</sup> -6.063x10 <sup>8</sup> )       | 55 | 4.254x10 <sup>7</sup> (2.568x10 <sup>7</sup> -7.844x10 <sup>7</sup> )       | 23 | 6.255x10 <sup>7</sup> (3.549x10 <sup>7</sup> -3.302x10 <sup>8</sup> )        | 15 | 8.555x10 <sup>7</sup> (4.728x10 <sup>7</sup> -1.706x10 <sup>8</sup> )        | 16 | p = 0.115        |
| ICAM-1         | 7.900x10 <sup>6</sup> (6.477x10 <sup>6</sup> -9.667x10 <sup>6</sup> )       | 60 | 7.857x10 <sup>6</sup> (6.349x10 <sup>6</sup> -8.995x10 <sup>6</sup> )       | 25 | 8.831x10 <sup>6</sup> (7.249x10 <sup>6</sup> -9.895x10 <sup>6</sup> )        | 18 | 7.304x10 <sup>6</sup> (6.263x10 <sup>6</sup> -9.691x10 <sup>6</sup> )        | 17 | p = 0.660        |
| CRP            | 9.916x10 <sup>7</sup> (3.910x10 <sup>7</sup> -2.256x10 <sup>8</sup> )       | 60 | 6.967x10 <sup>7</sup> (2.536x10 <sup>7</sup> -2.046x10 <sup>8</sup> )       | 26 | 1.600x10 <sup>8</sup> (5.280x10 <sup>7</sup> -2.377x10 <sup>8</sup> )        | 16 | 8.580 x10 <sup>7</sup> (2.078 x10 <sup>7</sup> -2.056 x10 <sup>7</sup> )     | 17 | p = 0.243        |
| MIP-3α         | 8.823 (5.663-13.612)                                                        | 67 | 8.603 (5.637-13.151)                                                        | 28 | 10.697 (6.706-13.859)                                                        | 18 | 8.808 (5.526-15.047)                                                         | 20 | p = 0.585        |
| IL-31          | 0.243 (0.145-0.688)                                                         | 36 | 0.312 (0.165-0.713)                                                         | 15 | 0.191 (0.101-0.243)                                                          | 12 | 0.704 (0.486-0.975)                                                          | 9  | <b>p = 0.027</b> |
| IL-27          | 1335.0 (906.7-1833.1)                                                       | 66 | 1122.2 (728.5-1694.0)                                                       | 28 | 1206.4 (1002.5-1540.5)                                                       | 18 | 1621.9 (1120.1-2018.0)                                                       | 20 | p = 0.112        |
| IL-23          | 19.245 (8.864-165.521)                                                      | 12 | 15.727 (10.279-22.819)                                                      | 22 | 26.136 (9.424-32.634)                                                        | 16 | 28.842 (7.771-40.381)                                                        | 17 | p = 0.839        |
| IL-22          | 1.302 (0.702-12.532)                                                        | 64 | 1.140 (0.692-1.975)                                                         | 27 | 1.528 (0.693-2.376)                                                          | 18 | 1.222 (0.816-2.833)                                                          | 19 | p = 0.891        |
| IL-21          | 6.015 (3.500-9.673)                                                         | 21 | 5.442 (3.166-11.024)                                                        | 11 | 6.015 (5.223-6.105)                                                          | 3  | 8.881 (3.397-11.272)                                                         | 7  | p = 0.965        |
| TNF-α          | 1.463 (1.198-2.122)                                                         | 67 | 1.356 (1.154-2.013)                                                         | 28 | 2.163 (1.497-3.265)                                                          | 19 | 1.325 (1.112-1.507)                                                          | 20 | <b>p = 0.003</b> |
| IL-8           | 4.636 (2.847-5.886)                                                         | 66 | 4.670 (3.767-5.794)                                                         | 27 | 5.287 (4.196-8.000)                                                          | 19 | 3.076 (2.498-4.845)                                                          | 20 | p = 0.053        |
| IL-6           | 1.374 (0.778-2.279)                                                         | 65 | 1.421 (0.689-2.849)                                                         | 27 | 1.379 (1.066-1.961)                                                          | 19 | 1.355 (0.750-2.216)                                                          | 19 | p = 0.859        |
| IL-4           | 8.517x10 <sup>-3</sup> (5.213 x10 <sup>-3</sup> -17.383 x10 <sup>-3</sup> ) | 40 | 9.448 x10 <sup>-3</sup> (5.308 x10 <sup>-3</sup> -21.711x10 <sup>-3</sup> ) | 15 | 11.053 x10 <sup>-3</sup> (6.667 x10 <sup>-3</sup> -19.006x10 <sup>-3</sup> ) | 13 | 7.885 x10 <sup>-3</sup> (3.684 x10 <sup>-3</sup> -10.757 x10 <sup>-3</sup> ) | 12 | p = 0.462        |
| IL-2           | 0.458 (0.218-0.624)                                                         | 29 | 0.398 (0.218-0.576)                                                         | 13 | 0.568 (0.064-0.717)                                                          | 9  | 0.459 (0.275-0.616)                                                          | 7  | p = 0.839        |
| IL-1β          | 0.080 (0.047-0.245)                                                         | 20 | 0.091 (0.066-0.238)                                                         | 9  | 0.061 (0.060-0.112)                                                          | 5  | 0.088 (0.033-0.343)                                                          | 6  | p = 0.897        |
| IL-13          | 0.628 (0.277-1.135)                                                         | 44 | 0.703 (0.277-1.159)                                                         | 20 | 0.566 (0.283-1.249)                                                          | 10 | 0.541 (0.382-0.762)                                                          | 14 | p = 0.604        |
| IL-12p70       | 0.187 (0.105-0.274)                                                         | 49 | 0.165 (0.099-0.328)                                                         | 22 | 0.190 (0.158-0.227)                                                          | 15 | 0.185 (0.083-0.328)                                                          | 12 | p = 0.909        |
| IL-10          | 0.120 (0.151-0.280)                                                         | 64 | 0.191 (0.154-0.267)                                                         | 27 | 0.200 (0.147-0.304)                                                          | 19 | 0.229 (0.154-0.278)                                                          | 18 | p = 0.945        |
| IFNγ           | 4.506 (2.801-7.108)                                                         | 64 | 5.202 (3.210-11.384)                                                        | 27 | 5.009 (3.389-10.519)                                                         | 18 | 3.031 (2.246-5.725)                                                          | 19 | p = 0.112        |
| TSLP           | 3.027x10 <sup>-9</sup> (6.953x10 <sup>-13</sup> ; 1.116x10 <sup>-8</sup> )  | 33 | 3.865x10 <sup>-9</sup> (1.522x10 <sup>-9</sup> ; 8.193x10 <sup>-9</sup> )   | 14 | 7.306x10 <sup>-9</sup> (4.688x10 <sup>-10</sup> ; 2.701x10 <sup>-8</sup> )   | 9  | 1.895x10 <sup>-9</sup> (1.246x10 <sup>-9</sup> ; 1.165x10 <sup>-8</sup> )    |    | p = 0.949        |
| IL-9           | 0.383 (0.218-0.751)                                                         | 30 | 0.354 (0.210-1.285)                                                         | 11 | 0.509 (0.287-0.772)                                                          | 9  | 0.389 (0.171-0.0.454)                                                        | 10 | p = 0.667        |
| IL-3           | 2.862 (1.471-5.051)                                                         | 14 | 1.843 (0.858-3.248)                                                         | 14 | 3.559 (1.658-5.539)                                                          | 7  | 2.896 (2.814-5.539)                                                          | 3  | p = 0.461        |
| IL-1RA         | 429.1 (243.4-587.3)                                                         | 67 | 426.5 (201.4-556.3)                                                         | 28 | 486.1 (355.3-904.2)                                                          | 19 | 351.9 (246.9-489.2)                                                          | 20 | p = 0.179        |
| IL-17D         | 15.966 (12.454-23.262)                                                      | 59 | 15.804 (11.932-19.566)                                                      | 24 | 13.975 (12.179-19423)                                                        | 16 | 20.538 (15.140-29.243)                                                       | 19 | p = 0.086        |
| IL-17C         | 5.151 (3.674-9.130)                                                         | 59 | 5.295 (3.814-9.203)                                                         | 27 | 4.668 (3.243-9.070)                                                          | 17 | 5.736 (4.041-8.574)                                                          | 15 | p = 0.576        |
| IL-17B         | 4.254 (3.285-6.988)                                                         | 56 | 4.071 (2.663-5.793)                                                         | 24 | 4.399 (3.923-8.038)                                                          | 17 | 3.644 (3.269-6.746)                                                          | 15 | p = 0.226        |
| IL-17A/F       | 1.530 (0.906-2.619)                                                         | 20 | 1.924 (1.054-3.043)                                                         | 10 | 1.056 (0.379-4.182)                                                          | 4  | 1.283 (1.069-2.137)                                                          | 6  | p = 0.734        |
| TNF-β          | 0.135 (0.105-0.200)                                                         | 42 | 0.153 (0.115-0.203)                                                         | 17 | 0.191 (0.121-0.240)                                                          | 12 | 0.110 (0.065-0.140)                                                          | 13 | p = 0.059        |
| IL-7           | 3.661 (2.213-5.553)                                                         | 65 | 4.168 (2.570-6.265)                                                         | 26 | 4.445 (2.428-7.346)                                                          | 19 | 3.068 (1.945-3.948)                                                          | 20 | p = 0.163        |
| IL-5           | 0.356 (0.226-0.486)                                                         | 45 | 0.362 (0.240-0.431)                                                         | 18 | 0.355 (0.230-0.501)                                                          | 12 | 0.287 (0.202-0.498)                                                          | 15 | p = 0.920        |
| IL-1α          | 3.546 (2.249-5.842)                                                         | 60 | 3.123 (1.846-5.185)                                                         | 24 | 3.187 (2.211-5.763)                                                          | 17 | 4.759 (2.636-6.312)                                                          | 19 | p = 0.329        |
| IL-17A         | 2.578 (1.256-4.748)                                                         | 59 | 2.490 (1.415; 5.266)                                                        | 24 | 4.445 (1.952-5.784)                                                          | 17 | 1.648 (0.783; 2.805)                                                         | 18 | <b>p = 0.022</b> |
| IL-16          | 256.73 (203.86-298.63)                                                      | 64 | 253.18 (200.65-290.22)                                                      | 26 | 264.25 (109.99-344.06)                                                       | 18 | 256.8 (212.9-294.3)                                                          | 20 | p = 0.890        |
| IL-15          | 2.204 (1.733-2.701)                                                         | 65 | 2.405 (1.964-2.710)                                                         | 26 | 2.467 (2.017-2.898)                                                          | 19 | 1.678 (1.437-2.118)                                                          | 20 | <b>p = 0.003</b> |
| IL-12/IL-23p40 | 93.772 (63.423-148.409)                                                     | 66 | 84.74 (64.66-123.62)                                                        | 27 | 129.512 (79.014-205.536)                                                     | 19 | 87.47 (56.86-136.88)                                                         | 20 | p = 0.123        |
| GM-CSF         | 0.109 (0.073-0.149)                                                         | 20 | 0.109 (0.089-0.128)                                                         | 8  | 0.088 (0.075-0.113)                                                          | 5  | 0.133 (0.068-0.177)                                                          | 7  | p = 0.909        |
| TARC           | 175.15 (104.51-304.21)                                                      | 67 | 142.34 (93.00-277.92)                                                       | 28 | 192.0 (120.4-307.9)                                                          | 19 | 179.61 (97.87-272.35)                                                        | 20 | p = 0.705        |
| MIP-1β         | 103.24 (69.29-147.24)                                                       | 67 | 89.55 (58.04-123.54)                                                        | 28 | 95.97 (69.29-141.21)                                                         | 19 | 135.76 (101.74-151.69)                                                       | 20 | p = 0.111        |
| MIP-1α         | 22.205 (13.498-26.500)                                                      | 51 | 16.792 (11.614-25.128)                                                      | 22 | 24.263 (19.169-26.582)                                                       | 14 | 23.970 (18.717-38.082)                                                       | 15 | p = 0.148        |
| MDC            | 1392.6 (1019.0-2016.1)                                                      | 67 | 1287.2 (900.1-1796.7)                                                       | 28 | 1698.0 (1093.2-2181.4)                                                       | 19 | 1300.4 (1100.5-1743.6)                                                       | 20 | p = 0.411        |
| MCP-4          | 80.85 (68.71-124.52)                                                        | 67 | 76.56 (69.09-124.39)                                                        | 28 | 77.25 (68.33-125.29)                                                         | 19 | 99.54 (75.45-125.40)                                                         | 20 | p = 0.532        |
| MCP-1          | 171.23 (99.93-234.36)                                                       | 67 | 130.80 (93.62-212.38)                                                       | 28 | 198.49 (91.69-268.87)                                                        | 19 | 189.03 (142.57-216.82)                                                       | 20 | p = 0.339        |
| IP-10          | 509.1 (340.2-724.4)                                                         | 67 | 445.8 (306.6-644.1)                                                         | 28 | 509.1 (374.1-798.1)                                                          | 19 | 655.5 (467.5-769.9)                                                          | 20 | p = 0.182        |
| Eotaxin-3      | 23.418 (17.050-34.368)                                                      | 45 | 22.46 (16.88-31.02)                                                         | 20 | 26.68 (21.60-39.24)                                                          | 13 | 22.280 (12.466-29.051)                                                       | 9  | p = 0.239        |
| Eotaxin        | 340.5 (223.6-432.6)                                                         | 67 | 251.8 (194.7-385.1)                                                         | 28 | 327.1 (235.4-443.5)                                                          | 19 | 408.8 (314.3-451.8)                                                          | 20 | <b>p = 0.044</b> |
| bFGF           | 319.432 (130.323-527.229)                                                   | 65 | 313.531 (135.580-510.118)                                                   | 26 | 319.43 (126.17-512.83)                                                       | 19 | 384.19 (129.70-508.57)                                                       | 20 | p = 0.926        |

|        |                                                                         |    |                                                                          |    |                                                                        |    |                                                                       |    |                     |
|--------|-------------------------------------------------------------------------|----|--------------------------------------------------------------------------|----|------------------------------------------------------------------------|----|-----------------------------------------------------------------------|----|---------------------|
| VEGF-D | 2.058x10 <sup>4</sup> (1.586 x10 <sup>4</sup> -2.656 x10 <sup>4</sup> ) | 65 | 2.031x10 <sup>4</sup> (1.562 x10 <sup>4</sup> -2.667 x10 <sup>4</sup> )  | 27 | 2.299x10 <sup>4</sup> (1.711 x10 <sup>4</sup> -2.808x10 <sup>4</sup> ) | 19 | 2.004x10 <sup>4</sup> (1.592x10 <sup>4</sup> -2.406x10 <sup>4</sup> ) | 20 | p = 0.749           |
| VEGF-C | 1.607x10 <sup>4</sup> (0.911x10 <sup>4</sup> -2.474x10 <sup>4</sup> )   | 62 | 1.791x10 <sup>3</sup> (0.916 x10 <sup>3</sup> -2.454 x10 <sup>3</sup> )  | 27 | 1.516x10 <sup>3</sup> (0.997x10 <sup>3</sup> -2.888x10 <sup>3</sup> )  | 18 | 1.355x10 <sup>3</sup> (0.896x10 <sup>3</sup> -1.755x10 <sup>3</sup> ) | 18 | p = 0.513           |
| VEGF-A | 2.007x10 <sup>4</sup> (1.508x10 <sup>4</sup> -3.437x10 <sup>4</sup> )   | 65 | 2.031 x10 <sup>3</sup> (1.409 x10 <sup>3</sup> -3.839 x10 <sup>3</sup> ) | 27 | 2.353x10 <sup>3</sup> (1.918x10 <sup>3</sup> -4.849x10 <sup>3</sup> )  | 19 | 1.693x10 <sup>3</sup> (1.251x10 <sup>3</sup> -2.697x10 <sup>3</sup> ) | 20 | p = 0.095           |
| Tie-2  | 95.02 (70.55-110.34)                                                    | 65 | 1.234x10 <sup>5</sup> (0.826 x10 <sup>5</sup> -1.368x10 <sup>5</sup> )   | 25 | 1.130x10 <sup>5</sup> (0.781x10 <sup>5</sup> -1.330x10 <sup>5</sup> )  | 19 | 5.913x10 <sup>5</sup> (4.533x10 <sup>5</sup> -8.550x10 <sup>5</sup> ) | 20 | <b>p &lt; 0.001</b> |
| PIGF   | 95.02 (70.55-110.34)                                                    | 65 | 100.90 (83.39-109.38)                                                    | 26 | 102.57 (78.90-124.83)                                                  | 19 | 74.76 (60.39-99.99)                                                   | 20 | p = 0.096           |
| Flt-1  | 1.826x10 <sup>3</sup> (1.459x10 <sup>3</sup> -2.379x10 <sup>3</sup> )   | 65 | 1.998 x10 <sup>3</sup> (1.535 x10 <sup>3</sup> -2.324 x10 <sup>3</sup> ) | 26 | 1.826 x10 <sup>3</sup> (1.663x10 <sup>3</sup> -2.461x10 <sup>3</sup> ) | 19 | 1.528x10 <sup>3</sup> (1.275x10 <sup>3</sup> -2.394x10 <sup>3</sup> ) | 20 | p = 0.341           |

Biomarker levels at baseline were presented with medians and corresponding interquartile ranges (IQR). All values are given in pg/ml. PsA, psoriatic arthritis; TNFi, Tumor Necrosis Factor alpha inhibitor; IL-17Ai, interleukin-17 inhibitor; MTX, methotrexate; VCAM, Vascular Cell Adhesion Molecule; SAA, serum amyloid; ICAM, Intercellular Adhesion Molecule; CRP, C-reactive protein; MIP, macrophage inflammatory protein; IL, interleukin; TNF, Tumor Necrosis Factor; IFN, interferon; TSLP, Thymic Stromal Lymphopoietin; IL-1RA, interleukin 1 receptor antagonist; GM-CSF, Granulocyte-Macrophage Colony-Stimulating-Factor; TARC, Thymus and activation regulated chemokine; MDC, macrophage-derived chemokine; MCP, monocyte chemoattractant protein; IP-10, IFN-induced protein-10; bFGF, basic Fibroblast Growth Factor; VEGF, Vascular Endothelial Growth Factor; Tie-2, endothelial receptor tyrosine kinase; PIGF, Placental Growth Factor; Fms related Receptor Tyrosine Kinase-1.
